# Supplementary material for: Characterization of inexpensive MOx sensor performance for trace methane detection
Source: Copernicus journal article supplement (doi:10.5194/amt-2022-110), 2022-05-23
Supplement: Supplementary file [file amt-2022-110-AC3-supplement.pdf]

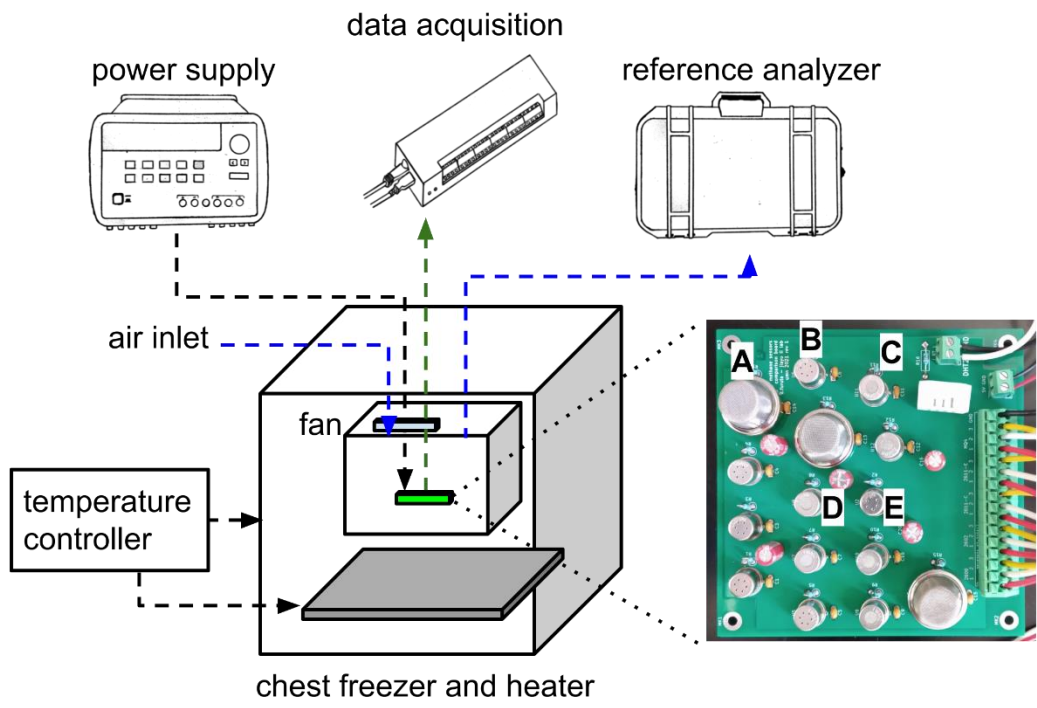

Figure 1

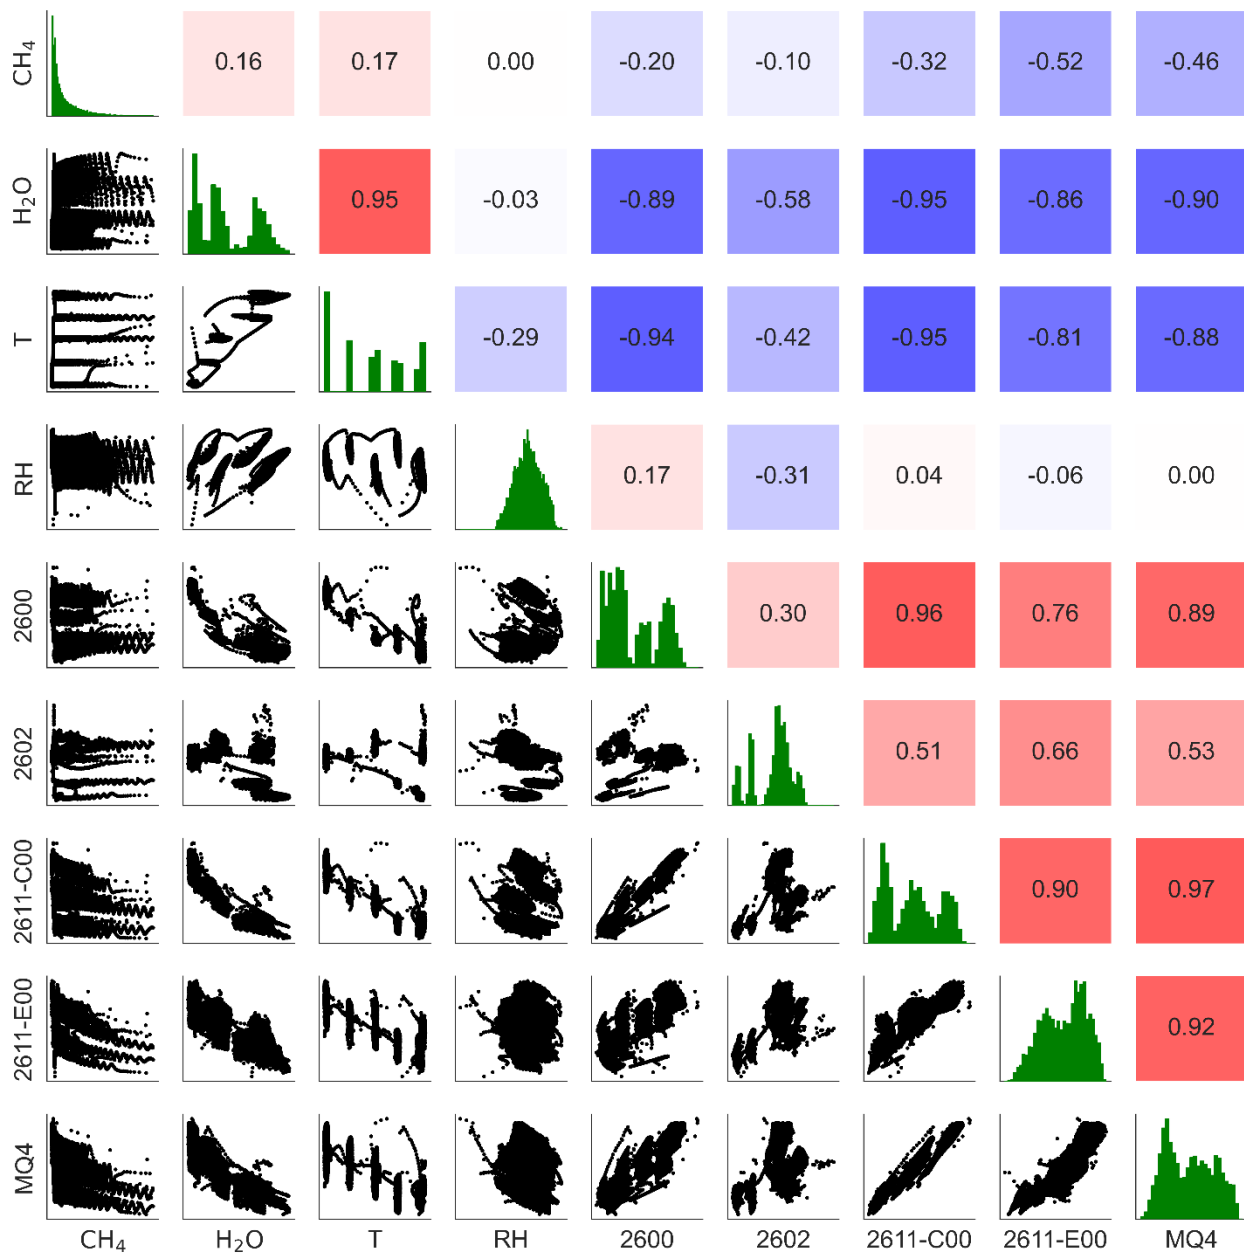

Figure 3

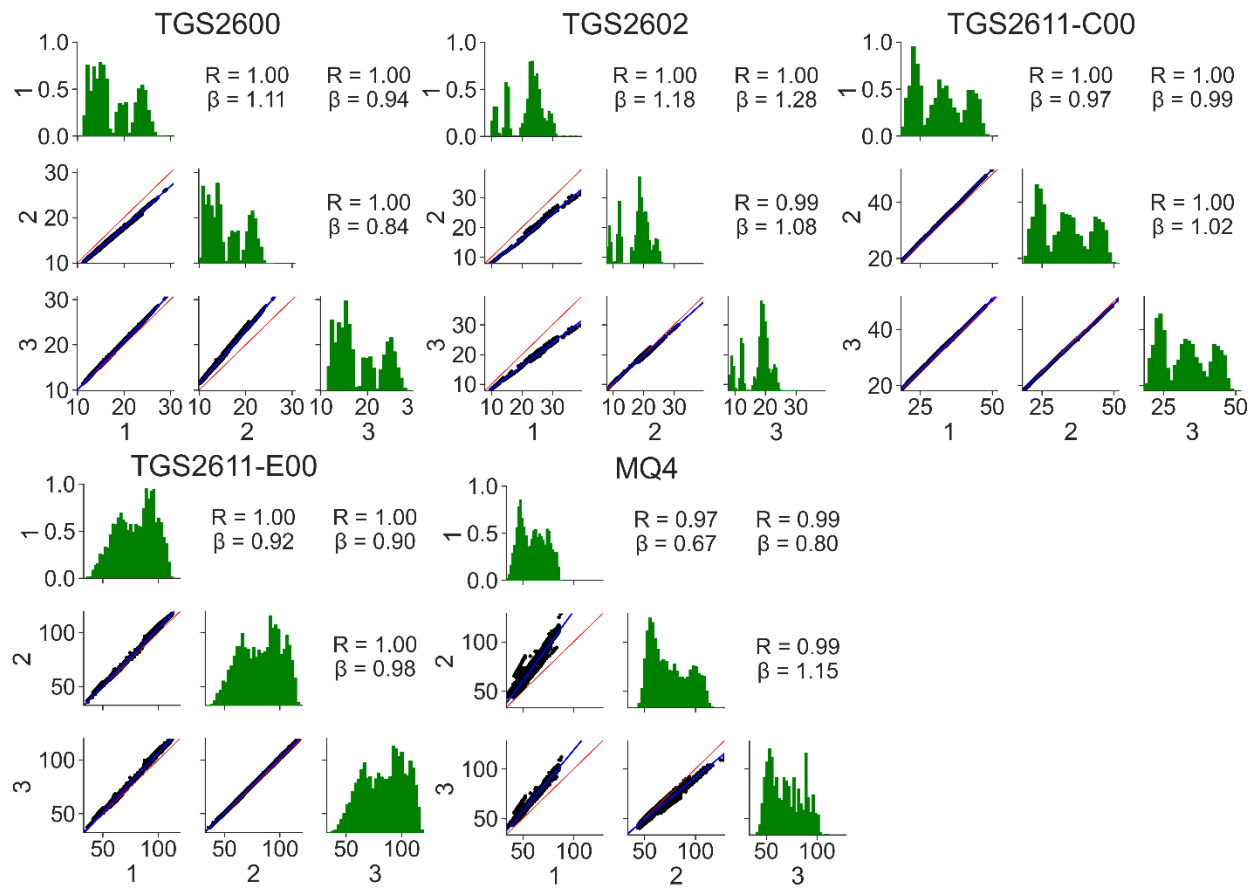

Figure 4

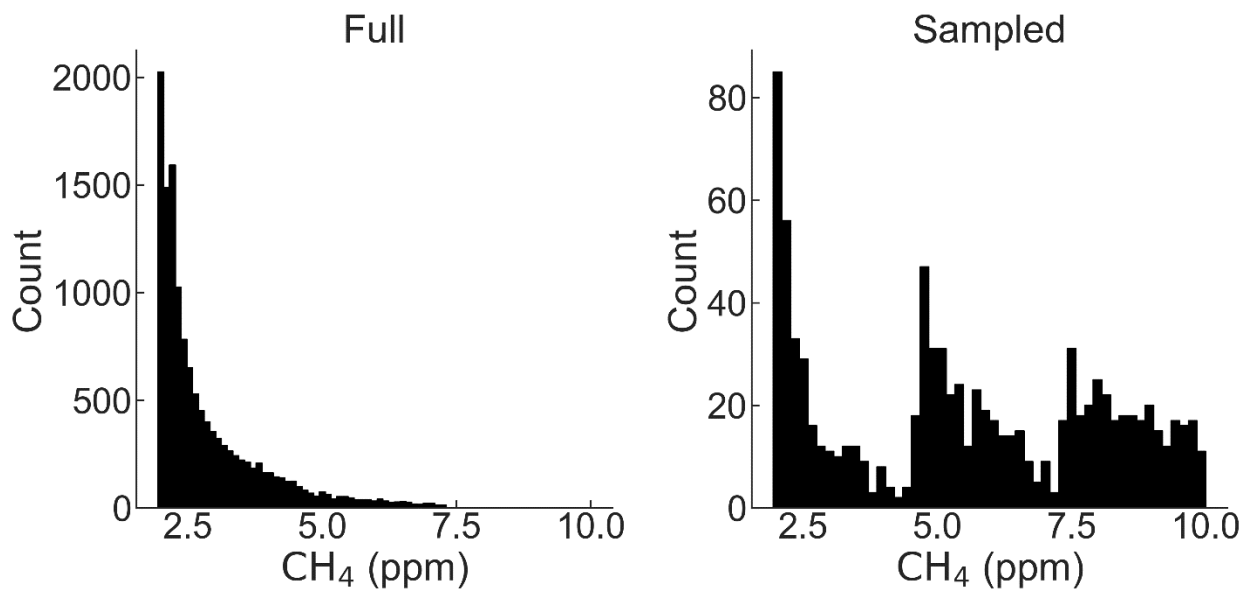

Figure 5

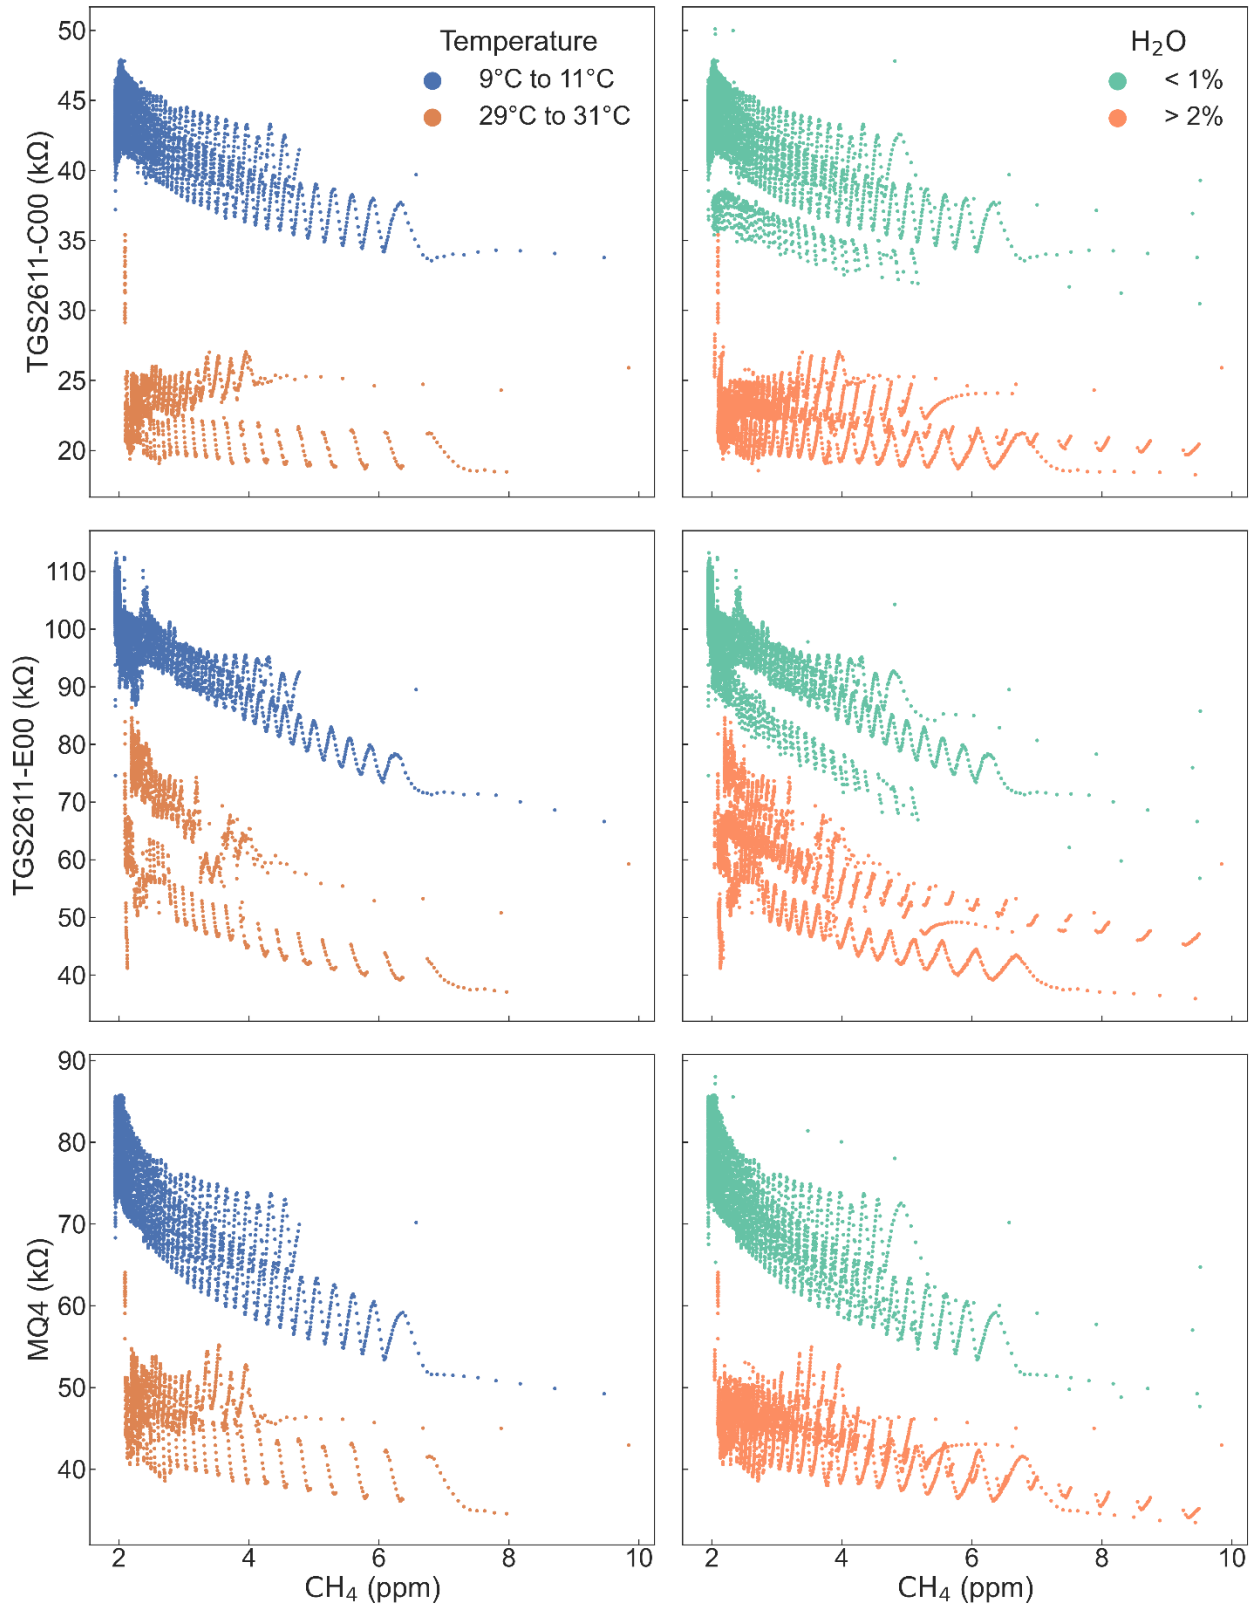

Figure 7
